# Supplementary material for: Regulating the electronic structure of metal–organic frameworks via ion-exchanged Ir dispersion for robust overall water splitting
Source: Royal Society of Chemistry journal article supplement (doi:10.1039/d3cc04990f), 2023-01-01
Supplement: d3cc04990f1.pdf [file d3cc04990f1.pdf]

## Supporting Information

### **Regulating electronic structure of metal–organic framework via ion-exchanged Ir dispersion for robust overall water splitting**

Shunfa Zhou,<sup>a</sup> Yuxuan Liu,<sup>b</sup> Jiawei Shi,<sup>a</sup> Jing Li,<sup>a</sup> Weiwei Cai<sup>\*a</sup>

<sup>a</sup> Sustainable Energy Laboratory, Faculty of Materials Science and Chemistry, China University of Geosciences, Wuhan, 430074, China.

E-mail: willcai1985@gmail.com; caiww@cug.edu.cn.

<sup>b</sup> Wuhan Monitoring Station, State Urban Water Supply Quality monitoring Network, No. 240 Jiefang Avenue, 430034, Wuhan, China

## Experimental

### Synthesis of Co-BDC

A uniformly stable solution A was prepared by mixing 1 mmol of  $\text{Co}(\text{NO}_3)_2 \cdot 6\text{H}_2\text{O}$  in 4.5 mL of N, N-dimethylformamide (DMF). Simultaneously, a solution B was prepared by taking 1 mmol of terephthalic acid and dissolving it in 7.5 mL of DMF. Subsequently, 1 mL of 0.4 M NaOH solution was added to this mixture. Then, solution A was poured into solution B. The resulting mixture was transferred into a 25 mL Teflon-sealed autoclave together with a piece of pre-treated nickel foam (NF, 1.5 cm  $\times$  3 cm). The hydrothermal reaction was conducted at 100 °C for 15 h, and the product was then rinsed with deionized water. Finally, Co-BDC was obtained after drying at 65 °C.

### Synthesis of $\text{CoIr}_x\text{-BDC}$

Certain amount (10, 20, 30 and 40 mg) of  $\text{IrCl}_3$  was dissolved in 18 mL ethanol and a Co-BDC sheet was immersed in the  $\text{IrCl}_3$  solution in a 25 mL Teflon-sealed autoclave for hydrothermal reaction at 80 °C for 12 h. After the reaction, the resulting blackened NF was rinsed with ethanol repeatedly. Finally,  $\text{CoIr}_x\text{-BDC}$  products ( $x=1, 2, 3$  and 4 with 10, 20, 30 and 40 mg  $\text{IrCl}_3$ , respectively) were obtained after drying.

### Characterizations.

The crystal phase of both freshly synthesized powders were detected by X-ray diffraction (XRD, Bruker AXS D8-Focus, Germany) with Cu K $\alpha$  radiation in the range of  $2\theta$  from 10° to 80°. The micromorphology of  $\text{CoIr}_x\text{-BDC}$  and Co-BDC powders were observed by means of a field emission scanning electron microscopy (FESEM, Hitachi SU8010, Japan). The X-ray photoelectron spectroscopy (XPS, Escalab 250XI, ThermoFisher, USA) was employed to further explore the composition, chemical environment and surface electronic state of the

samples, and the atomic proportion of each element is determined by the area ratio of its characteristic peaks. All XPS profiles are aligned by C 1s (284.60 eV). The transmission electron microscope (TEM) and high-resolution transmission electron microscope (HR-TEM) images were observed under JEM-2100F field emission transmission electron microscopy. The Ir content of all samples were measured by Inductively coupled plasma mass spectrometry (ICP-MS).

### **Electrochemical measurements**

All the electrochemical measurements were performed on a Gamry electrochemical workstation with a typical three-electrode system configuration in 1 M KOH. LSV at a scan rate of  $5 \text{ mV s}^{-1}$  was performed under 1 M KOH electrolyte using various catalysts as the working electrode, graphite rod as the counter electrode and Hg/HgO electrode as the reference electrode with iR compensation unless otherwise stated. The reference electrode, Hg/HgO was calibrated with respect to the reversible hydrogen electrode (RHE),  $E_{\text{RHE}} = E_{\text{Hg/HgO}} + 0.059 \times \text{pH} + 0.099$ . Operando electrochemical impedance spectroscopy (EIS) tests were performed over a frequency range from 0.05 to  $10^5$  Hz with AC amplitude of 10 mV. The durability of CoIr<sub>3</sub>-BDC catalyst tested by Chronopotentiometry (CP) method for 30h.

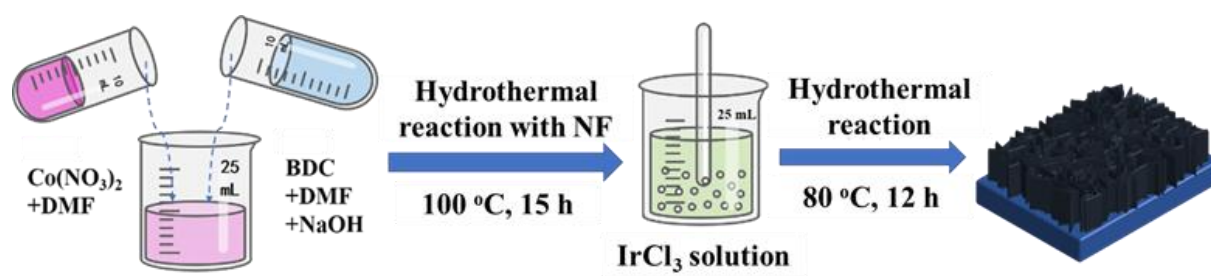

**Figure S1.** Schematic illustration of the synthetic process of CoIr<sub>x</sub>-BDC.

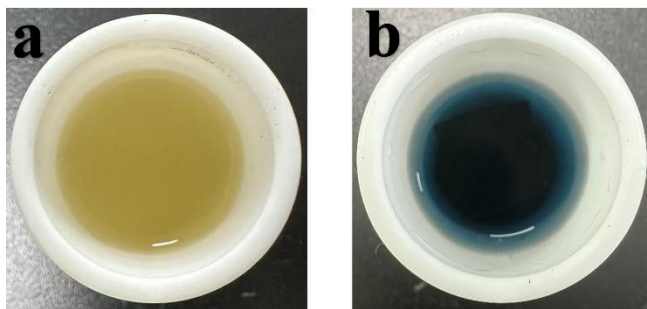

**Figure S2.** Optical images of solution in the pressure vessel before (a) and after (b) reaction.

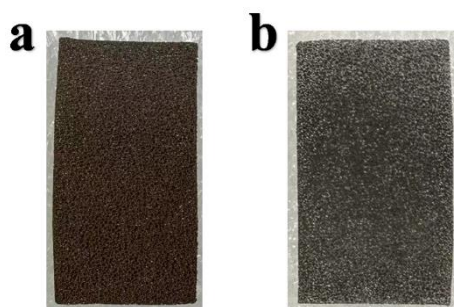

**Figure S3.** Optical images of Co-BDC and CoIr<sub>3</sub>-BDC.

Photographs of the solution within the pressure vessel were captured prior to and subsequent to the reaction. The observed color change, from brown to blue, after the reaction indicates the successful substitution of partial Co sites by Ir atoms via the ion exchange process (Figure S2). Additionally, the alteration of the Co-BDC color from brown to black following the ion exchange provides supplementary evidence supporting the incorporation of Ir elements into the Co-BDC MOF materials via the ion exchange strategy (Figure S3).

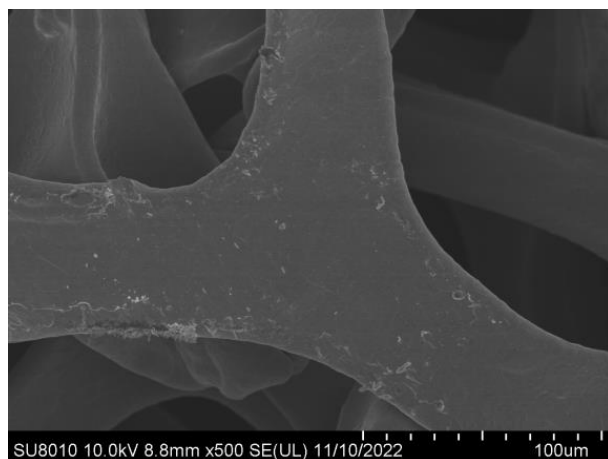

**Figure S4.** SEM images of bare NF.

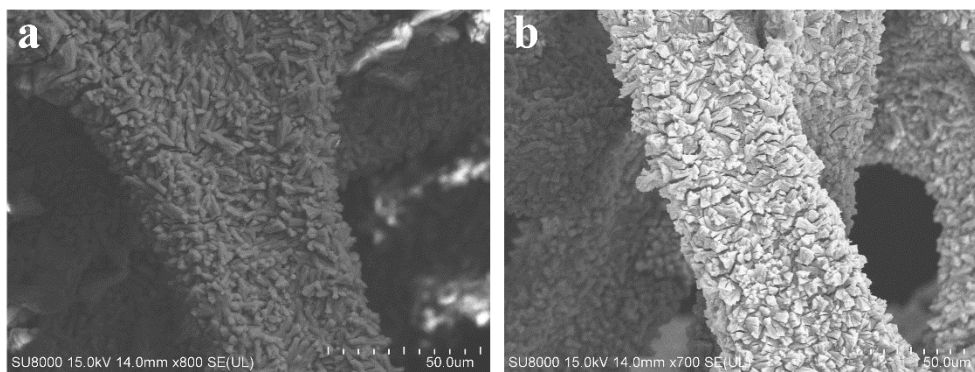

**Figure S5.** SEM images of Co-BDC and CoIr<sub>3</sub>-BDC at higher magnification.

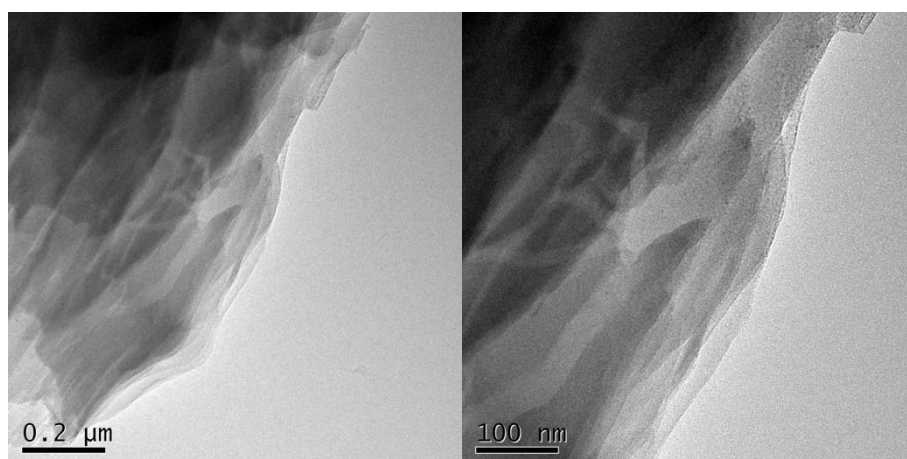

**Figure S6.** TEM images of CoIr<sub>3</sub>-BDC catalyst.

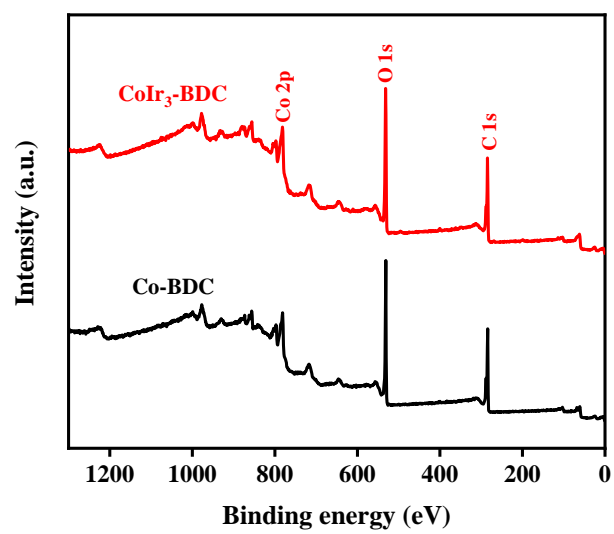

**Figure S7.** Survey XPS spectra of Co-BDC and CoIr<sub>3</sub>-BDC.

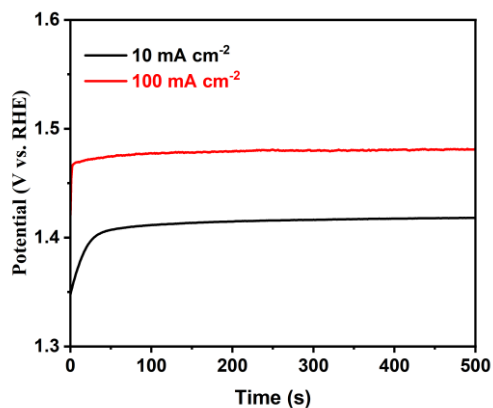

**Figure S8.** OER chronopotentiometry curves of CoIr<sub>3</sub>-BDC at 10 and 100 mA cm<sup>-2</sup>.

For the precise determination of the actual overpotential encountered during the Oxygen Evolution Reaction (OER) process, a chronopotentiometry analysis of CoIr<sub>3</sub>-BDC was conducted at current densities of 10 and 100 mA cm<sup>-2</sup>. This methodology was employed to address potential uncertainties arising from significant cathodic peaks observed at lower potentials in the polarization curve. The results, depicted in Figure S8, highlight the exceptional catalytic efficiency of CoIr<sub>3</sub>-BDC, as evidenced by the corresponding  $\eta_{10}$  and  $\eta_{100}$  values of 186 and 252 mV, respectively. Importantly, these values exhibit a close resemblance to those derived from the LSV curve.

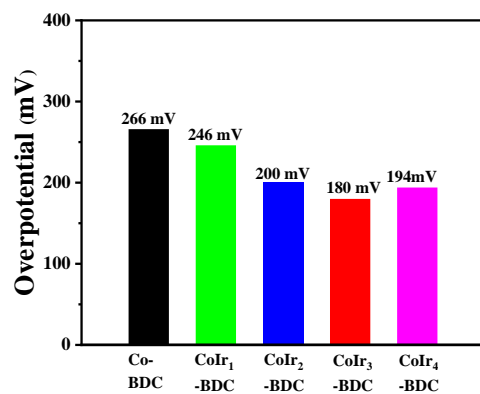

**Figure S9.** The OER overpotential of CoIr<sub>x</sub>-BDC and Co-BDC catalysts to reach 10 mA cm<sup>-2</sup>.

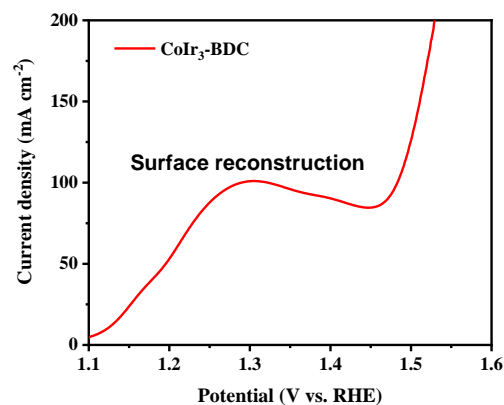

**Figure S10.** LSV curve of CoIr<sub>3</sub>-BDC measured in the forward direction.

As shown in Figure S10, the LSV curve measured in the forward direction exhibits a large oxidation peak, which can be attributed to the oxidation of Co<sup>2+</sup> to high-valence state Co species, indicating the surface reconstruction of CoIr<sub>3</sub>-BDC during the OER process.

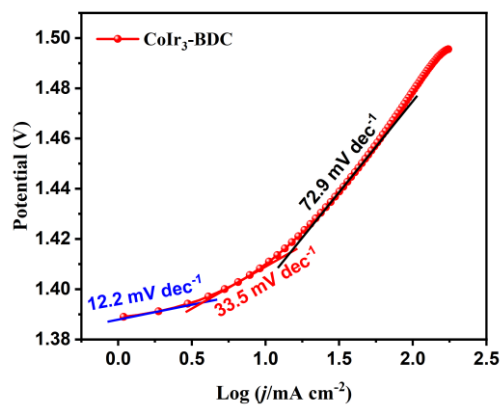

**Figure S11.** Tafel plots of CoIr<sub>3</sub>-BDC with different current range.

Typically, the Tafel slope is determined within a current density range below or around 10 mA cm<sup>-2</sup>. Therefore, we opted for a current density range around 10 mA cm<sup>-2</sup> to derive the Tafel slope of CoIr<sub>3</sub>-BDC

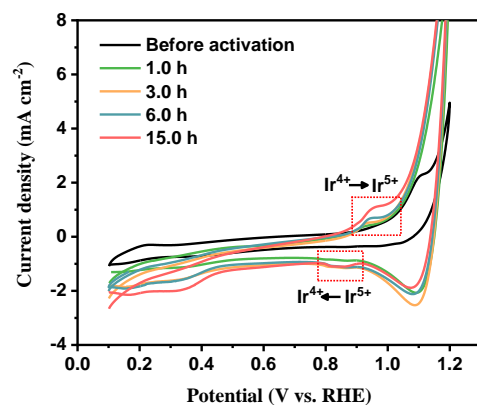

**Figure S12.** CV curves of CoIr<sub>3</sub>-BDC with 10 mV/s scan rate. It was recorded before and after 1, 3, 6 and 15 h chronopotentiometric OER process.

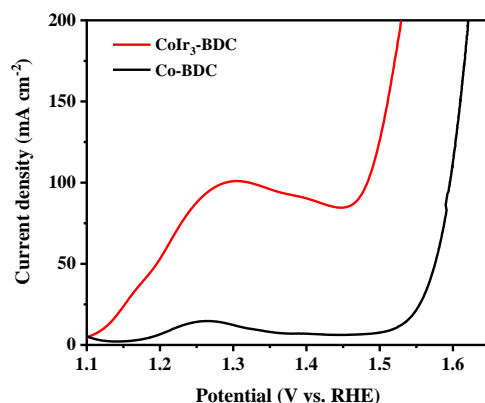

**Figure S13.** OER LSV curves of CoIr<sub>3</sub>-BDC and Co-BDC.

Figure S12 shows the CV curves before and after several hours (1, 3, 6 and 15 h) of the CP test (fixed at a current of 100 mA cm<sup>-2</sup>). The oxidation peak at 0.95 V is attributed to the Ir<sup>4+</sup>/Ir<sup>5+</sup> oxidation peak. The appearance of Ir<sup>4+</sup>/Ir<sup>5+</sup> suggests that available active sites are present on the surface. This most likely originated from an increase in Ir sites with increasing OER potential or cycle number because of coordination with more O species during the OER process. Significantly, the Ir<sup>4+</sup>/Ir<sup>5+</sup> oxidation peak emerges immediately after only 1.0 h of the CP process and shows a time-dependent current density enhancement from 1.0 to 15 h. This indicates the formation of Ir<sup>5+</sup> species and the more pronounced surface oxidation transition of Ir<sup>4+</sup>/Ir<sup>5+</sup> during the OER. According to the OER mechanism that involves the onset of the OER starting with Ir<sup>4+</sup>-OH becoming oxidized to Ir<sup>5+</sup>=O, the formation of Ir<sup>5+</sup> sites is a necessary condition for the OER. Hence, the introduced Ir in CoIr<sub>3</sub>-BDC is considered one of the active sites for the OER. The Co<sup>2+</sup>→Co<sup>3+/4+</sup> oxidation peak is located at ~1.3 V in the CoIr<sub>3</sub>-BDC LSV curve (Figure S13). This Co<sup>2+</sup>→Co<sup>3+/4+</sup> oxidation peak is affected by the introducing metal cations in CoIr<sub>3</sub>-BDC. Compared with Co-BDC, the increase in the oxidation peak of CoIr<sub>3</sub>-BDC suggests that Co atoms become more electrochemically active after the introduction of Ir. Thus, it can be concluded that Co sites and Ir sites both serve as active sites for CoIr<sub>3</sub>-BDC during OER process.

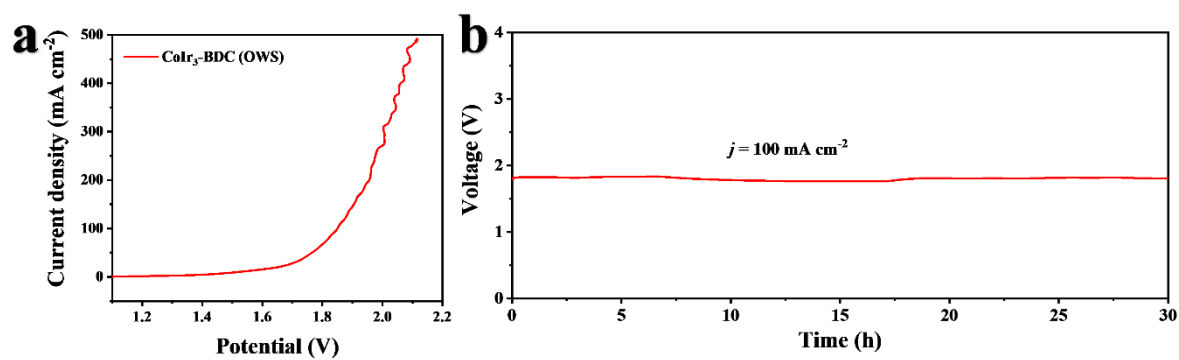

**Figure S14.** Overall water splitting performance. (a) LSV curves of the CoIr<sub>3</sub>-BDC||CoIr<sub>3</sub>-BDC in 1 M KOH without iR compensation and (b) CP curve of CoIr<sub>3</sub>-BDC toward overall water splitting at 100 mA cm<sup>-2</sup>.

**Table S1.** Ir content of CoIr<sub>x</sub>-BDC catalysts measured by ICP-MS.

| Catalyst                | CoIr <sub>1</sub> -BDC | CoIr <sub>2</sub> -BDC | CoIr <sub>3</sub> -BDC | CoIr <sub>4</sub> -BDC |
|-------------------------|------------------------|------------------------|------------------------|------------------------|
| <b>Ir content (wt%)</b> | 0.19%                  | 0.23%                  | 0.28%                  | 0.44%                  |
